# Supplementary material for: Quantitative CRISPR interference screens in yeast identify chemical-genetic interactions and new rules for guide RNA design
Source: Genome Biol. 2016 Mar 8;17:45. doi: 10.1186/s13059-016-0900-9 (PMC4784398; doi:10.1186/s13059-016-0900-9)
Supplement: Additional file 15: — Nucleosome occupancy scores of gRNA target regions based on tiling array analysis. (XLSX 49 kb) [file 13059_2016_900_MOESM15_ESM.xlsx]

## Sheet: README
Additional data file 15. Nucleosome occupancy scores of gRNA regions based on tiling array analysis
Column Name	Description
Library_name	name of gRNA library/pool
ORF	Systematic Name of Target Gene
Gene_name	Standard Name of Target Gene
Chromosome	The target gene's chromosome
ORF_strand	DNA strand containing the target Gene
Guide_name	Guide Identifier
Aimed_strand	DNA strand targetted by the gRNA
Specificity_sequence	Sequence of the specficity-determining sequence of the guide
guide_window_start (2006 genome build)	genomic position (2006 genome build) of the start of the guide window
guide_window_end (2006 genome build)	genomic position (2006 genome build) of the end of the guide window
Partner Reference Compound	Small-molecule specific to the target gene as defined by the reference set
Compound_conc	Small-molecule concentration used in the screen
avg_log2 (from Lee et al)	the average of log2 scores (a measure of nucleosome occupancy) associated with genomic positions within the guide window
A	ATc- effect in paired compound (gRNA effect)
var(A)	variance of ATc- effect

## Sheet: Additional File 15
Library_name	ORF	Gene_name	Chromosome	ORF_strand	Guide_name	Aimed_strand	Specificity_sequence	guide_window_start (2006 genome build)	guide_window_end (2006 genome build)	Partner Reference Compound	Compound_conc	avg_log2 (from Lee et al)	A	var(A)
broad_tiling	YHR007C	ERG11	VIII	-	ERG11-121332-20bp	template	ATTTGTCTTCAACGCTAAGT	121327	121352	Fluconazole	20uM	0.316207	0.406	0.00463
broad_tiling	YHR007C	ERG11	VIII	-	ERG11-121361-20bp	template	ACTGTGTATTTAGGACCAAA	121356	121381	Fluconazole	20uM	0.305063	0.038	0.0219
broad_tiling	YHR007C	ERG11	VIII	-	ERG11-121362-20bp	template	GACTGTGTATTTAGGACCAA	121357	121382	Fluconazole	20uM	0.282501	0.791	0.0073
broad_tiling	YHR007C	ERG11	VIII	-	ERG11-121368-20bp	nontemplate	AAGACAAATTCGTGACCCTT	121338	121363	Fluconazole	20uM	0.32923	-0.145	0.00765
broad_tiling	YHR007C	ERG11	VIII	-	ERG11-121370-20bp	template	AGAGTCATGACTGTGTATTT	121365	121390	Fluconazole	20uM	0.203691	0.417	0.00453
broad_tiling	YHR007C	ERG11	VIII	-	ERG11-121421-20bp	template	GAAGAATGTCAAAAGAAATA	121416	121441	Fluconazole	20uM	-0.0285933	0.423	0.0281
broad_tiling	YHR007C	ERG11	VIII	-	ERG11-121458-20bp	nontemplate	CATTCTTCGAAAAACTCGTA	121428	121453	Fluconazole	20uM	-0.040125	0.069	0.0126
broad_tiling	YHR007C	ERG11	VIII	-	ERG11-121466-20bp	template	GTCGGTAGTGCTGTTGTGTA	121461	121486	Fluconazole	20uM	0.143886	0.41	0.00351
broad_tiling	YHR007C	ERG11	VIII	-	ERG11-121484-20bp	template	TTTTACTGGATTCCATGGGT	121479	121504	Fluconazole	20uM	0.200925	0.592	0.0143
broad_tiling	YHR007C	ERG11	VIII	-	ERG11-121488-20bp	template	AGTGTTTTACTGGATTCCAT	121483	121508	Fluconazole	20uM	0.197003	0.153	0.0143
broad_tiling	YHR007C	ERG11	VIII	-	ERG11-121489-20bp	template	TAGTGTTTTACTGGATTCCA	121484	121509	Fluconazole	20uM	0.197003	0.019	0.00372
broad_tiling	YHR007C	ERG11	VIII	-	ERG11-121494-20bp	nontemplate	ACAACAGCACTACCGACCCA	121464	121489	Fluconazole	20uM	0.145005	-0.012	0.00844
broad_tiling	YHR007C	ERG11	VIII	-	ERG11-121498-20bp	template	GTCCACCTCTAGTGTTTTAC	121493	121518	Fluconazole	20uM	0.178824	0.526	0.00609
broad_tiling	YHR007C	ERG11	VIII	-	ERG11-121515-20bp	nontemplate	GGAATCCAGTAAAACACTAG	121485	121510	Fluconazole	20uM	0.195523	-8.074	0.513
broad_tiling	YHR007C	ERG11	VIII	-	ERG11-121518-20bp	nontemplate	ATCCAGTAAAACACTAGAGG	121488	121513	Fluconazole	20uM	0.193857	-7.557	9.75
broad_tiling	YHR007C	ERG11	VIII	-	ERG11-121522-20bp	nontemplate	AGTAAAACACTAGAGGTGGA	121492	121517	Fluconazole	20uM	0.18131	-3.257	0.0373
broad_tiling	YHR007C	ERG11	VIII	-	ERG11-121524-20bp	template	ATTACTATATTCTTTGAGAA	121519	121544	Fluconazole	20uM	-0.0324517	0.38	0.0233
broad_tiling	YHR007C	ERG11	VIII	-	ERG11-121549-20bp	template	CTTTCATTTACAATATTGTA	121544	121569	Fluconazole	20uM	-0.249318	0.399	0.00318
broad_tiling	YHR007C	ERG11	VIII	-	ERG11-121572-20bp	nontemplate	CATACAATATTGTAAATGAA	121542	121567	Fluconazole	20uM	-0.247084	0.041	0.0174
broad_tiling	YHR007C	ERG11	VIII	-	ERG11-121600-20bp	nontemplate	TTATGATCAAAGAGATTCTT	121570	121595	Fluconazole	20uM	0.00798857	0.309	0.0126
broad_tiling	YHR007C	ERG11	VIII	-	ERG11-121601-20bp	nontemplate	TATGATCAAAGAGATTCTTT	121571	121596	Fluconazole	20uM	0.00906833	-0.035	0.00873
broad_tiling	YHR007C	ERG11	VIII	-	ERG11-121602-20bp	template	TCATTTCTTGGCTTTACCAT	121597	121622	Fluconazole	20uM	0.142573	0.178	0.00253
broad_tiling	YHR007C	ERG11	VIII	-	ERG11-121608-20bp	nontemplate	AAAGAGATTCTTTGGGCCAA	121578	121603	Fluconazole	20uM	0.0400971	0.268	0.00261
broad_tiling	YHR007C	ERG11	VIII	-	ERG11-121614-20bp	template	CATTGGTTTAAGTCATTTCT	121609	121634	Fluconazole	20uM	0.151436	0.368	0.0208
broad_tiling	YHR007C	ERG11	VIII	-	ERG11-121631-20bp	template	GCATTGGAATACGTAAACAT	121626	121651	Fluconazole	20uM	0.0928886	0.636	0.0195
gene_tiling_18bp	YHR007C	ERG11	VIII	-	ERG11-121647-18bp	template	CAATCGTTGGAGAGGCAT	121642	121665	Fluconazole	20uM	0.0712517	0.641	0.00852
gene_tiling_20bp	YHR007C	ERG11	VIII	-	ERG11-121647-20bp	template	GTCAATCGTTGGAGAGGCAT	121642	121667	Fluconazole	20uM	0.0655514	0.869	0.0166
broad_tiling	YHR007C	ERG11	VIII	-	ERG11-121647-20bp	template	GTCAATCGTTGGAGAGGCAT	121642	121667	Fluconazole	20uM	0.0655514	0.355	0.002
gene_tiling_18bp	YHR007C	ERG11	VIII	-	ERG11-121653-18bp	template	CCAAGTCAATCGTTGGAG	121648	121671	Fluconazole	20uM	0.0688017	0.164	0.0114
gene_tiling_20bp	YHR007C	ERG11	VIII	-	ERG11-121653-20bp	template	TACCAAGTCAATCGTTGGAG	121648	121673	Fluconazole	20uM	0.0688017	0.88	0.00841
broad_tiling	YHR007C	ERG11	VIII	-	ERG11-121653-20bp	template	TACCAAGTCAATCGTTGGAG	121648	121673	Fluconazole	20uM	0.0688017	0.524	0.00835
gene_tiling_18bp	YHR007C	ERG11	VIII	-	ERG11-121658-18bp	template	TGCTACCAAGTCAATCGT	121653	121676	Fluconazole	20uM	0.0702467	0.264	0.00557
broad_tiling	YHR007C	ERG11	VIII	-	ERG11-121658-20bp	template	TCTGCTACCAAGTCAATCGT	121653	121678	Fluconazole	20uM	0.0629671	0.502	0.00884
gene_tiling_20bp	YHR007C	ERG11	VIII	-	ERG11-121658-20bp	template	TCTGCTACCAAGTCAATCGT	121653	121678	Fluconazole	20uM	0.0629671	0.395	0.0151
gene_tiling_18bp	YHR007C	ERG11	VIII	-	ERG11-121673-18bp	nontemplate	CCTCTCCAACGATTGACT	121645	121668	Fluconazole	20uM	0.0714033	0.154	0.00266
gene_tiling_20bp	YHR007C	ERG11	VIII	-	ERG11-121673-20bp	nontemplate	TGCCTCTCCAACGATTGACT	121643	121668	Fluconazole	20uM	0.0714033	-1.477	0.0149
broad_tiling	YHR007C	ERG11	VIII	-	ERG11-121673-20bp	nontemplate	TGCCTCTCCAACGATTGACT	121643	121668	Fluconazole	20uM	0.0714033	-1.82	0.0123
gene_tiling_18bp	YHR007C	ERG11	VIII	-	ERG11-121684-18bp	template	GAACAAACGAGTAATACA	121679	121702	Fluconazole	20uM	-0.0851133	-1.058	0.0198
gene_tiling_20bp	YHR007C	ERG11	VIII	-	ERG11-121684-20bp	template	CAGAACAAACGAGTAATACA	121679	121704	Fluconazole	20uM	-0.0851133	0.316	0.0107
broad_tiling	YHR007C	ERG11	VIII	-	ERG11-121684-20bp	template	CAGAACAAACGAGTAATACA	121679	121704	Fluconazole	20uM	-0.0851133	-0.67	0.0233
gene_tiling_18bp	YHR007C	ERG11	VIII	-	ERG11-121719-18bp	template	TTCCTTCACAATTGCAGC	121714	121737	Fluconazole	20uM	-0.0947233	0.287	0.00696
gene_tiling_20bp	YHR007C	ERG11	VIII	-	ERG11-121719-20bp	template	TTTTCCTTCACAATTGCAGC	121714	121739	Fluconazole	20uM	-0.08636	1.417	0.0119
broad_tiling	YHR007C	ERG11	VIII	-	ERG11-121719-20bp	template	TTTTCCTTCACAATTGCAGC	121714	121739	Fluconazole	20uM	-0.08636	0.446	0.00676
gene_tiling_18bp	YHR007C	ERG11	VIII	-	ERG11-121737-18bp	nontemplate	AGCCTGCTGCAATTGTGA	121709	121732	Fluconazole	20uM	-0.0867033	0.686	0.0115
gene_tiling_20bp	YHR007C	ERG11	VIII	-	ERG11-121737-20bp	nontemplate	CAAGCCTGCTGCAATTGTGA	121707	121732	Fluconazole	20uM	-0.0867033	-0.48	0.0274
broad_tiling	YHR007C	ERG11	VIII	-	ERG11-121737-20bp	nontemplate	CAAGCCTGCTGCAATTGTGA	121707	121732	Fluconazole	20uM	-0.0867033	-1.221	0.0254
gene_tiling_18bp	YHR007C	ERG11	VIII	-	ERG11-121791-18bp	template	AGCGTGTGTATTTTCGAT	121786	121809	Fluconazole	20uM	-0.609135	0.614	0.00287
gene_tiling_20bp	YHR007C	ERG11	VIII	-	ERG11-121791-20bp	template	TCAGCGTGTGTATTTTCGAT	121786	121811	Fluconazole	20uM	-0.592501	0.741	0.00877
broad_tiling	YHR007C	ERG11	VIII	-	ERG11-121791-20bp	template	TCAGCGTGTGTATTTTCGAT	121786	121811	Fluconazole	20uM	-0.592501	0.203	0.00314
gene_tiling_18bp	YHR007C	ERG11	VIII	-	ERG11-121864-18bp	nontemplate	AATTTACCAATAACGAAA	121836	121859	Fluconazole	20uM	-0.697125	0.34	0.0114
gene_tiling_20bp	YHR007C	ERG11	VIII	-	ERG11-121864-20bp	nontemplate	ATAATTTACCAATAACGAAA	121834	121859	Fluconazole	20uM	-0.663617	-0.41	0.0863
broad_tiling	YHR007C	ERG11	VIII	-	ERG11-121864-20bp	nontemplate	ATAATTTACCAATAACGAAA	121834	121859	Fluconazole	20uM	-0.663617	-1.403	0.23
broad_tiling	YHR007C	ERG11	VIII	-	ERG11-121865-20bp	nontemplate	TAATTTACCAATAACGAAAA	121835	121860	Fluconazole	20uM	-0.697125	-7.197	0.681
gene_tiling_18bp	YHR007C	ERG11	VIII	-	ERG11-121872-18bp	nontemplate	AATAACGAAAAGGGAAAA	121844	121867	Fluconazole	20uM	-0.764095	-7.168	0.688
broad_tiling	YHR007C	ERG11	VIII	-	ERG11-121872-20bp	nontemplate	CCAATAACGAAAAGGGAAAA	121842	121867	Fluconazole	20uM	-0.733657	-5.616	10.2
gene_tiling_18bp	YHR007C	ERG11	VIII	-	ERG11-121878-18bp	nontemplate	GAAAAGGGAAAAAGGAAA	121850	121873	Fluconazole	20uM	-0.772793	-6.339	0.545
broad_tiling	YHR007C	ERG11	VIII	-	ERG11-121878-20bp	nontemplate	ACGAAAAGGGAAAAAGGAAA	121848	121873	Fluconazole	20uM	-0.772793	-6.605	9.92
gene_tiling_20bp	YHR007C	ERG11	VIII	-	ERG11-121878-20bp	nontemplate	ACGAAAAGGGAAAAAGGAAA	121848	121873	Fluconazole	20uM	-0.772793	-6.871	9.8
broad_tiling	YHR007C	ERG11	VIII	-	ERG11-121879-20bp	nontemplate	CGAAAAGGGAAAAAGGAAAA	121849	121874	Fluconazole	20uM	-0.803154	-6.426	10
gene_tiling_18bp	YHR007C	ERG11	VIII	-	ERG11-121915-18bp	nontemplate	TTGAAAGAGAGAATTAAG	121887	121910	Fluconazole	20uM	-0.969785	-4.283	0.096
broad_tiling	YHR007C	ERG11	VIII	-	ERG11-121915-20bp	nontemplate	CATTGAAAGAGAGAATTAAG	121885	121910	Fluconazole	20uM	-0.994037	-8.762	12.3
gene_tiling_18bp	YHR007C	ERG11	VIII	-	ERG11-121932-18bp	nontemplate	GAGGGAATAAGAAAACTA	121904	121927	Fluconazole	20uM	-1.06004	-7.79	1.94
broad_tiling	YHR007C	ERG11	VIII	-	ERG11-121932-20bp	nontemplate	AAGAGGGAATAAGAAAACTA	121902	121927	Fluconazole	20uM	-1.02638	-6.046	0.527
gene_tiling_20bp	YHR007C	ERG11	VIII	-	ERG11-121932-20bp	nontemplate	AAGAGGGAATAAGAAAACTA	121902	121927	Fluconazole	20uM	-1.02638	-6.335	1.84
broad_tiling	YHR007C	ERG11	VIII	-	ERG11-121933-20bp	nontemplate	AGAGGGAATAAGAAAACTAA	121903	121928	Fluconazole	20uM	-1.06004	-3.012	0.277
gene_tiling_18bp	YHR007C	ERG11	VIII	-	ERG11-121967-18bp	nontemplate	TTATATAATGAATACACA	121939	121962	Fluconazole	20uM	-1.06999	-4.491	0.134
gene_tiling_20bp	YHR007C	ERG11	VIII	-	ERG11-121967-20bp	nontemplate	TCTTATATAATGAATACACA	121937	121962	Fluconazole	20uM	-1.06687	-8.941	10.6
broad_tiling	YHR007C	ERG11	VIII	-	ERG11-121967-20bp	nontemplate	TCTTATATAATGAATACACA	121937	121962	Fluconazole	20uM	-1.06687	-9.048	9.61
gene_tiling_18bp	YHR007C	ERG11	VIII	-	ERG11-121970-18bp	nontemplate	TATAATGAATACACATGG	121942	121965	Fluconazole	20uM	-1.06999	-6.922	1.02
gene_tiling_20bp	YHR007C	ERG11	VIII	-	ERG11-121970-20bp	nontemplate	TATATAATGAATACACATGG	121940	121965	Fluconazole	20uM	-1.06999	-8.97	9.22
broad_tiling	YHR007C	ERG11	VIII	-	ERG11-121970-20bp	nontemplate	TATATAATGAATACACATGG	121940	121965	Fluconazole	20uM	-1.06999	-11.152	9.77
broad_tiling	YHR007C	ERG11	VIII	-	ERG11-121971-20bp	nontemplate	ATATAATGAATACACATGGA	121941	121966	Fluconazole	20uM	-1.04562	-2.175	0.0459
broad_tiling	YHR007C	ERG11	VIII	-	ERG11-122027-20bp	nontemplate	ACGTAAACGTCGTTAACTCG	121997	122022	Fluconazole	20uM	-0.385631	-3.037	0.0222
broad_tiling	YHR007C	ERG11	VIII	-	ERG11-122041-20bp	nontemplate	AACTCGTGGAGATGCACAAT	122011	122036	Fluconazole	20uM	-0.514207	-3.484	0.0424
broad_tiling	YHR007C	ERG11	VIII	-	ERG11-122075-20bp	nontemplate	CCAAGAAAAAAAAAAAATTC	122045	122070	Fluconazole	20uM	-1.01281	0.078	0.0028
broad_tiling	YHR007C	ERG11	VIII	-	ERG11-122092-20bp	template	AAGTGTGGTAGGTATCTTGC	122087	122112	Fluconazole	20uM	-1.51517	-6.217	0.272
broad_tiling	YHR007C	ERG11	VIII	-	ERG11-122103-20bp	template	CAGAACACAATAAGTGTGGT	122098	122123	Fluconazole	20uM	-2.38557	-5.239	0.323
broad_tiling	YHR007C	ERG11	VIII	-	ERG11-122107-20bp	template	CTTGCAGAACACAATAAGTG	122102	122127	Fluconazole	20uM	-2.77497	-7.579	10.4
broad_tiling	YHR007C	ERG11	VIII	-	ERG11-122191-20bp	nontemplate	AGTTTCGTTTCGTTTCGTTT	122161	122186	Fluconazole	20uM	-1.50611	-0.005	0.00782
broad_tiling	YHR007C	ERG11	VIII	-	ERG11-122192-20bp	nontemplate	GTTTCGTTTCGTTTCGTTTA	122162	122187	Fluconazole	20uM	-1.50611	0.415	0.00362
broad_tiling	YHR007C	ERG11	VIII	-	ERG11-122193-20bp	template	AAACGAGACAAACGAAGCGC	122188	122213	Fluconazole	20uM	-1.21019	-0.199	0.00609
broad_tiling	YHR007C	ERG11	VIII	-	ERG11-122231-20bp	template	GCCGGGTTGGACAATCTTAA	122226	122251	Fluconazole	20uM	-1.39528	-1.345	0.0115
broad_tiling	YHR007C	ERG11	VIII	-	ERG11-122244-20bp	template	GCGTGCAAGATTTGCCGGGT	122239	122264	Fluconazole	20uM	-1.41996	0.48	0.00253
broad_tiling	YHR007C	ERG11	VIII	-	ERG11-122248-20bp	template	ATGTGCGTGCAAGATTTGCC	122243	122268	Fluconazole	20uM	-1.48303	-0.339	0.0121
broad_tiling	YHR007C	ERG11	VIII	-	ERG11-122249-20bp	template	AATGTGCGTGCAAGATTTGC	122244	122269	Fluconazole	20uM	-1.48303	0.166	0.00248
broad_tiling	YHR007C	ERG11	VIII	-	ERG11-122252-20bp	nontemplate	GCCTTTAAGATTGTCCAACC	122222	122247	Fluconazole	20uM	-1.38872	-0.506	0.00664
broad_tiling	YHR007C	ERG11	VIII	-	ERG11-122296-20bp	template	TATAGTAATGTCACACGAAG	122291	122316	Fluconazole	20uM	-3.86461	-1.956	0.0444
broad_tiling	YGR060W	ERG25	VII	+	ERG25-610002-20bp	nontemplate	CGTAAACGACACCCGATAAC	610006	610031	1181-0519	10uM	-1.00293	-1.418	0.0108
broad_tiling	YGR060W	ERG25	VII	+	ERG25-610012-20bp	template	GAAAGAGCAGAGCCAGTTAT	609991	610016	1181-0519	10uM	-0.672657	-0.955	0.00826
broad_tiling	YGR060W	ERG25	VII	+	ERG25-610013-20bp	template	AAAGAGCAGAGCCAGTTATC	609992	610017	1181-0519	10uM	-0.688968	-1.597	0.00802
broad_tiling	YGR060W	ERG25	VII	+	ERG25-610025-20bp	nontemplate	GAGCTGGCTAAACGACATCT	610029	610054	1181-0519	10uM	-1.01143	-0.585	0.00967
broad_tiling	YGR060W	ERG25	VII	+	ERG25-610026-20bp	nontemplate	GGAGCTGGCTAAACGACATC	610030	610055	1181-0519	10uM	-0.942833	-0.772	0.016
broad_tiling	YGR060W	ERG25	VII	+	ERG25-610041-20bp	nontemplate	GGCAGTGGCCGTTGCGGAGC	610045	610070	1181-0519	10uM	-0.607632	0.048	0.00169
broad_tiling	YGR060W	ERG25	VII	+	ERG25-610047-20bp	nontemplate	GGTAGTGGCAGTGGCCGTTG	610051	610076	1181-0519	10uM	-0.571076	-0.777	0.0103
broad_tiling	YGR060W	ERG25	VII	+	ERG25-610055-20bp	template	TCGTTTAGCCAGCTCCGCAA	610034	610059	1181-0519	10uM	-0.821216	-1.655	0.0158
broad_tiling	YGR060W	ERG25	VII	+	ERG25-610056-20bp	nontemplate	GGAGGCAGTGGTAGTGGCAG	610060	610085	1181-0519	10uM	-0.701888	-1.642	0.00568
broad_tiling	YGR060W	ERG25	VII	+	ERG25-610062-20bp	nontemplate	ACGAAGGGAGGCAGTGGTAG	610066	610091	1181-0519	10uM	-1.03926	-6.22	0.151
broad_tiling	YGR060W	ERG25	VII	+	ERG25-610068-20bp	nontemplate	CCGTATACGAAGGGAGGCAG	610072	610097	1181-0519	10uM	-1.38695	-5.109	0.281
broad_tiling	YGR060W	ERG25	VII	+	ERG25-610074-20bp	nontemplate	TGTGTCCCGTATACGAAGGG	610078	610103	1181-0519	10uM	-1.80476	-2.325	0.039
broad_tiling	YGR060W	ERG25	VII	+	ERG25-610077-20bp	nontemplate	CTCTGTGTCCCGTATACGAA	610081	610106	1181-0519	10uM	-2.00568	0.313	0.0213
broad_tiling	YGR060W	ERG25	VII	+	ERG25-610078-20bp	nontemplate	TCTCTGTGTCCCGTATACGA	610082	610107	1181-0519	10uM	-2.08001	-1.877	0.0084
broad_tiling	YGR060W	ERG25	VII	+	ERG25-610090-20bp	template	CCACTGCCTCCCTTCGTATA	610069	610094	1181-0519	10uM	-1.11369	-1.769	0.00775
broad_tiling	YGR060W	ERG25	VII	+	ERG25-610091-20bp	template	CACTGCCTCCCTTCGTATAC	610070	610095	1181-0519	10uM	-1.28081	-0.256	0.004
broad_tiling	YGR060W	ERG25	VII	+	ERG25-610110-20bp	template	CGGGACACAGAGATCGTATA	610089	610114	1181-0519	10uM	-2.34101	-7.845	10.3
broad_tiling	YGR060W	ERG25	VII	+	ERG25-610128-20bp	template	TACGGTAAACGACTAGCACT	610107	610132	1181-0519	10uM	-2.48965	-0.372	0.0142
broad_tiling	YGR060W	ERG25	VII	+	ERG25-610149-20bp	nontemplate	TTGAGGTTGCTGACTGTTAT	610153	610178	1181-0519	10uM	-1.09071	-0.679	0.00131
broad_tiling	YGR060W	ERG25	VII	+	ERG25-610166-20bp	nontemplate	GTTTTGTGCCAGGTGCCTTG	610170	610195	1181-0519	10uM	-0.4545	-2.871	0.0215
broad_tiling	YGR060W	ERG25	VII	+	ERG25-610173-20bp	template	GATAACAGTCAGCAACCTCA	610152	610177	1181-0519	10uM	-1.09071	-6.647	0.218
broad_tiling	YGR060W	ERG25	VII	+	ERG25-610176-20bp	nontemplate	TTCCTCGACGGTTTTGTGCC	610180	610205	1181-0519	10uM	-0.403093	-1.245	0.0083
broad_tiling	YGR060W	ERG25	VII	+	ERG25-610180-20bp	template	GTCAGCAACCTCAAGGCACC	610159	610184	1181-0519	10uM	-0.81371	-0.988	0.034
broad_tiling	YGR060W	ERG25	VII	+	ERG25-610188-20bp	nontemplate	GCAAAGGGCCTCTTCCTCGA	610192	610217	1181-0519	10uM	-0.543312	-4.66	0.0311
broad_tiling	YGR060W	ERG25	VII	+	ERG25-610196-20bp	template	CACCTGGCACAAAACCGTCG	610175	610200	1181-0519	10uM	-0.410753	-8.667	1.05
broad_tiling	YGR060W	ERG25	VII	+	ERG25-610202-20bp	template	GCACAAAACCGTCGAGGAAG	610181	610206	1181-0519	10uM	-0.403093	-6.505	2.03
broad_tiling	YGR060W	ERG25	VII	+	ERG25-610203-20bp	nontemplate	CGATGCGATACGGTGGCAAA	610207	610232	1181-0519	10uM	-0.66596	-4.46	0.269
broad_tiling	YGR060W	ERG25	VII	+	ERG25-610204-20bp	nontemplate	GCGATGCGATACGGTGGCAA	610208	610233	1181-0519	10uM	-0.673562	-3.218	0.0482
broad_tiling	YGR060W	ERG25	VII	+	ERG25-610210-20bp	nontemplate	GGGAAAGCGATGCGATACGG	610214	610239	1181-0519	10uM	-0.672684	-9.301	2.14
broad_tiling	YGR060W	ERG25	VII	+	ERG25-610213-20bp	nontemplate	GGTGGGAAAGCGATGCGATA	610217	610242	1181-0519	10uM	-0.687917	-8.212	2.1
broad_tiling	YGR060W	ERG25	VII	+	ERG25-610230-20bp	nontemplate	GCAAGAAAAAAAAAATTGGT	610234	610259	1181-0519	10uM	-0.525049	-2.904	0.0706
broad_tiling	YGR060W	ERG25	VII	+	ERG25-610231-20bp	nontemplate	AGCAAGAAAAAAAAAATTGG	610235	610260	1181-0519	10uM	-0.525049	-0.894	0.0797
broad_tiling	YGR060W	ERG25	VII	+	ERG25-610234-20bp	nontemplate	GCAAGCAAGAAAAAAAAAAT	610238	610263	1181-0519	10uM	-0.537579	-1.933	0.0773
broad_tiling	YGR060W	ERG25	VII	+	ERG25-610256-20bp	nontemplate	ATACGACCACAGCAGAGGCG	610260	610285	1181-0519	10uM	-1.50689	-6.035	9.91
broad_tiling	YGR060W	ERG25	VII	+	ERG25-610261-20bp	nontemplate	TAATAATACGACCACAGCAG	610265	610290	1181-0519	10uM	-1.82746	-7.191	1.04
broad_tiling	YGR060W	ERG25	VII	+	ERG25-610272-20bp	template	TGCTTGCCTCGCCTCTGCTG	610251	610276	1181-0519	10uM	-0.854917	-8.957	1.11
broad_tiling	YGR060W	ERG25	VII	+	ERG25-610328-20bp	nontemplate	AAGAAAATGTACATGCATAA	610332	610357	1181-0519	10uM	-1.05324	-2.659	0.0231
gene_tiling_18bp	YGR060W	ERG25	VII	+	ERG25-610362-18bp	nontemplate	ATAGAAGTATGCATACAC	610366	610389	1181-0519	10uM	0.000626667	-2.344	0.0241
gene_tiling_20bp	YGR060W	ERG25	VII	+	ERG25-610362-20bp	nontemplate	ATATAGAAGTATGCATACAC	610366	610391	1181-0519	10uM	0.00615	-7.838	9.53
broad_tiling	YGR060W	ERG25	VII	+	ERG25-610362-20bp	nontemplate	ATATAGAAGTATGCATACAC	610366	610391	1181-0519	10uM	0.00615	-9.326	11
broad_tiling	YGR060W	ERG25	VII	+	ERG25-610399-20bp	template	TTCTATATAATATATAATAC	610378	610403	1181-0519	10uM	0.0590143	-7.269	9.98
gene_tiling_18bp	YGR060W	ERG25	VII	+	ERG25-610402-18bp	template	TATAATATATAATACAGG	610383	610406	1181-0519	10uM	0.06885	-3.287	0.238
gene_tiling_20bp	YGR060W	ERG25	VII	+	ERG25-610402-20bp	template	TATATAATATATAATACAGG	610381	610406	1181-0519	10uM	0.06885	-7.241	1.12
broad_tiling	YGR060W	ERG25	VII	+	ERG25-610402-20bp	template	TATATAATATATAATACAGG	610381	610406	1181-0519	10uM	0.06885	-8.63	10.6
gene_tiling_18bp	YGR060W	ERG25	VII	+	ERG25-610438-18bp	nontemplate	AACGAAGAGAGAGAAAAA	610442	610465	1181-0519	10uM	-0.189012	-1.347	0.0363
gene_tiling_20bp	YGR060W	ERG25	VII	+	ERG25-610438-20bp	nontemplate	GAAACGAAGAGAGAGAAAAA	610442	610467	1181-0519	10uM	-0.235647	-8.205	10
gene_tiling_18bp	YGR060W	ERG25	VII	+	ERG25-610464-18bp	nontemplate	ATATAAAGATTTACTGGA	610468	610491	1181-0519	10uM	-1.0698	-1.641	0.0432
broad_tiling	YGR060W	ERG25	VII	+	ERG25-610464-20bp	nontemplate	TAATATAAAGATTTACTGGA	610468	610493	1181-0519	10uM	-1.0698	-2.854	0.0296
gene_tiling_20bp	YGR060W	ERG25	VII	+	ERG25-610464-20bp	nontemplate	TAATATAAAGATTTACTGGA	610468	610493	1181-0519	10uM	-1.0698	-3.032	0.0901
gene_tiling_18bp	YGR060W	ERG25	VII	+	ERG25-610468-18bp	nontemplate	ACTAATATAAAGATTTAC	610472	610495	1181-0519	10uM	-1.1697	-2.743	0.0745
gene_tiling_20bp	YGR060W	ERG25	VII	+	ERG25-610468-20bp	nontemplate	CAACTAATATAAAGATTTAC	610472	610497	1181-0519	10uM	-1.1697	-3.813	1.07
broad_tiling	YGR060W	ERG25	VII	+	ERG25-610468-20bp	nontemplate	CAACTAATATAAAGATTTAC	610472	610497	1181-0519	10uM	-1.1697	-6.714	2.22
gene_tiling_18bp	YGR060W	ERG25	VII	+	ERG25-610522-18bp	template	CTTTAGATAGTAGCATAG	610503	610526	1181-0519	10uM	-0.344745	0.097	0.0476
gene_tiling_20bp	YGR060W	ERG25	VII	+	ERG25-610522-20bp	template	CTCTTTAGATAGTAGCATAG	610501	610526	1181-0519	10uM	-0.344745	-0.761	0.0885
broad_tiling	YGR060W	ERG25	VII	+	ERG25-610522-20bp	template	CTCTTTAGATAGTAGCATAG	610501	610526	1181-0519	10uM	-0.344745	-2.004	0.0824
gene_tiling_18bp	YGR060W	ERG25	VII	+	ERG25-610529-18bp	template	TAGTAGCATAGAGGACTA	610510	610533	1181-0519	10uM	-0.240438	0.368	0.00424
broad_tiling	YGR060W	ERG25	VII	+	ERG25-610529-20bp	template	GATAGTAGCATAGAGGACTA	610508	610533	1181-0519	10uM	-0.240438	0.6	0.088
gene_tiling_20bp	YGR060W	ERG25	VII	+	ERG25-610529-20bp	template	GATAGTAGCATAGAGGACTA	610508	610533	1181-0519	10uM	-0.240438	0.594	0.0648
gene_tiling_18bp	YGR060W	ERG25	VII	+	ERG25-610558-18bp	template	TACAGCCATAAAAAAAAG	610539	610562	1181-0519	10uM	-0.064635	-1.321	0.0662
gene_tiling_20bp	YGR060W	ERG25	VII	+	ERG25-610558-20bp	template	AGTACAGCCATAAAAAAAAG	610537	610562	1181-0519	10uM	-0.064635	-1.362	0.131
broad_tiling	YGR060W	ERG25	VII	+	ERG25-610558-20bp	template	AGTACAGCCATAAAAAAAAG	610537	610562	1181-0519	10uM	-0.064635	-1.385	0.0224
gene_tiling_18bp	YGR060W	ERG25	VII	+	ERG25-610571-18bp	nontemplate	GGGTAGCGTTGTTGAAAA	610575	610598	1181-0519	10uM	0.465142	0.383	0.0176
gene_tiling_20bp	YGR060W	ERG25	VII	+	ERG25-610571-20bp	nontemplate	AAGGGTAGCGTTGTTGAAAA	610575	610600	1181-0519	10uM	0.455824	-1.255	0.0567
broad_tiling	YGR060W	ERG25	VII	+	ERG25-610571-20bp	nontemplate	AAGGGTAGCGTTGTTGAAAA	610575	610600	1181-0519	10uM	0.455824	-1.484	0.00608
gene_tiling_18bp	YGR060W	ERG25	VII	+	ERG25-610589-18bp	nontemplate	CTTGGACTAGACCTGAAA	610593	610616	1181-0519	10uM	0.375598	-1.219	0.162
gene_tiling_20bp	YGR060W	ERG25	VII	+	ERG25-610589-20bp	nontemplate	TGCTTGGACTAGACCTGAAA	610593	610618	1181-0519	10uM	0.375598	0.215	0.0201
broad_tiling	YGR060W	ERG25	VII	+	ERG25-610589-20bp	nontemplate	TGCTTGGACTAGACCTGAAA	610593	610618	1181-0519	10uM	0.375598	-0.512	0.0185
broad_tiling	YGR060W	ERG25	VII	+	ERG25-610590-20bp	nontemplate	TTGCTTGGACTAGACCTGAA	610594	610619	1181-0519	10uM	0.356366	-0.7	0.0239
gene_tiling_18bp	YGR060W	ERG25	VII	+	ERG25-610598-18bp	template	CAACAACGCTACCCTTTC	610579	610602	1181-0519	10uM	0.468157	0.169	0.00459
gene_tiling_20bp	YGR060W	ERG25	VII	+	ERG25-610598-20bp	template	TTCAACAACGCTACCCTTTC	610577	610602	1181-0519	10uM	0.468157	0.87	0.0109
broad_tiling	YGR060W	ERG25	VII	+	ERG25-610598-20bp	template	TTCAACAACGCTACCCTTTC	610577	610602	1181-0519	10uM	0.468157	0.386	0.00354
broad_tiling	YGR060W	ERG25	VII	+	ERG25-610605-20bp	nontemplate	TTTGTGAGTAGGTGCTTGCT	610609	610634	1181-0519	10uM	0.232058	-2.531	0.0283
broad_tiling	YGR060W	ERG25	VII	+	ERG25-610616-20bp	nontemplate	ATTTTGCAAAGTTTGTGAGT	610620	610645	1181-0519	10uM	0.0889633	-6.062	0.153
broad_tiling	YGR060W	ERG25	VII	+	ERG25-610643-20bp	nontemplate	ATTCAATTGAGGTTGGTAAT	610647	610672	1181-0519	10uM	-0.155566	-5.793	0.0862
broad_tiling	YGR060W	ERG25	VII	+	ERG25-610644-20bp	nontemplate	AATTCAATTGAGGTTGGTAA	610648	610673	1181-0519	10uM	-0.170503	-0.226	0.00805
broad_tiling	YGR060W	ERG25	VII	+	ERG25-610650-20bp	nontemplate	CCATGAAATTCAATTGAGGT	610654	610679	1181-0519	10uM	-0.14303	0.325	0.00458
broad_tiling	YGR060W	ERG25	VII	+	ERG25-610654-20bp	nontemplate	TTCTCCATGAAATTCAATTG	610658	610683	1181-0519	10uM	-0.113244	-0.599	0.00915
broad_tiling	YGR060W	ERG25	VII	+	ERG25-610672-20bp	template	CCAACCTCAATTGAATTTCA	610651	610676	1181-0519	10uM	-0.15628	0.304	0.0109
broad_tiling	YGR060W	ERG25	VII	+	ERG25-610683-20bp	template	TGAATTTCATGGAGAAATAC	610662	610687	1181-0519	10uM	-0.0941871	0.123	0.00378
broad_tiling	YGR060W	ERG25	VII	+	ERG25-610684-20bp	template	GAATTTCATGGAGAAATACT	610663	610688	1181-0519	10uM	-0.0941871	0.626	0.00966
broad_tiling	YGR060W	ERG25	VII	+	ERG25-610685-20bp	nontemplate	GTTCATGTAACTGTACCATG	610689	610714	1181-0519	10uM	0.008645	-2.207	0.0669
broad_tiling	YGR060W	ERG25	VII	+	ERG25-610692-20bp	template	TGGAGAAATACTGGGCCGCA	610671	610696	1181-0519	10uM	-0.0287529	0.483	0.00722
broad_tiling	YGR060W	ERG25	VII	+	ERG25-610720-20bp	template	TTACATGAACAATGATGTTT	610699	610724	1181-0519	10uM	-0.0422171	0.385	0.00347
broad_tiling	YGR060W	ERG25	VII	+	ERG25-610721-20bp	nontemplate	TAAAAAGAACATTAGACCGG	610725	610750	1181-0519	10uM	-0.0806917	-0.611	0.0145
broad_tiling	YGR060W	ERG25	VII	+	ERG25-610724-20bp	nontemplate	CAATAAAAAGAACATTAGAC	610728	610753	1181-0519	10uM	-0.07064	-2.297	0.0207
broad_tiling	YGR060W	ERG25	VII	+	ERG25-610727-20bp	template	AACAATGATGTTTTGGCCAC	610706	610731	1181-0519	10uM	-0.0645271	0.334	0.00372
broad_tiling	YGR060W	ERG25	VII	+	ERG25-610777-20bp	nontemplate	ATTTGGTCGATGATGAACCA	610781	610806	1181-0519	10uM	0.17365	-2.975	0.113
broad_tiling	YGR060W	ERG25	VII	+	ERG25-610782-20bp	template	ATTTCTTTAGATGTTTGCCA	610761	610786	1181-0519	10uM	0.0240533	0.005	0.016
broad_tiling	YGR060W	ERG25	VII	+	ERG25-610794-20bp	nontemplate	ATCTTCTAAAGTATGGAATT	610798	610823	1181-0519	10uM	0.275901	-0.464	0.00884
broad_tiling	YGR060W	ERG25	VII	+	ERG25-610801-20bp	nontemplate	AACTTCCATCTTCTAAAGTA	610805	610830	1181-0519	10uM	0.26598	0.004	0.0101
broad_tiling	YGR060W	ERG25	VII	+	ERG25-610828-20bp	nontemplate	TTAGCACTTGGAATCTTAGT	610832	610857	1181-0519	10uM	0.0656017	-4.248	0.0566
broad_tiling	YGR060W	ERG25	VII	+	ERG25-610840-20bp	nontemplate	TATAGTTGTTCCTTAGCACT	610844	610869	1181-0519	10uM	-0.098635	0.379	0.00253
broad_tiling	YGR060W	ERG25	VII	+	ERG25-610852-20bp	template	AACTAAGATTCCAAGTGCTA	610831	610856	1181-0519	10uM	0.0789729	0.784	0.0164
broad_tiling	YGR060W	ERG25	VII	+	ERG25-610874-20bp	nontemplate	CAAGAAATGAGATAGAAGAA	610878	610903	1181-0519	10uM	0.0401686	-1.211	0.066
broad_tiling	YGR060W	ERG25	VII	+	ERG25-610897-20bp	template	CGTTCTTCTATCTCATTTCT	610876	610901	1181-0519	10uM	0.0311383	0.57	0.00318
broad_tiling	YGR060W	ERG25	VII	+	ERG25-610903-20bp	template	TCTATCTCATTTCTTGGTCG	610882	610907	1181-0519	10uM	0.0468371	0.411	0.0039
broad_tiling	YGR060W	ERG25	VII	+	ERG25-610904-20bp	nontemplate	GTGGAAGGTCCAGATAGGGA	610908	610933	1181-0519	10uM	0.0841183	-1.862	0.0195
broad_tiling	YGR060W	ERG25	VII	+	ERG25-610908-20bp	nontemplate	TTGGGTGGAAGGTCCAGATA	610912	610937	1181-0519	10uM	0.0926983	-7.45	0.743
broad_tiling	YGR060W	ERG25	VII	+	ERG25-610909-20bp	nontemplate	ATTGGGTGGAAGGTCCAGAT	610913	610938	1181-0519	10uM	0.0926983	-8.096	0.983
broad_tiling	YGR060W	ERG25	VII	+	ERG25-610917-20bp	template	TGGTCGAGGCCATCCCTATC	610896	610921	1181-0519	10uM	0.071945	0.378	0.00304
broad_tiling	YGR060W	ERG25	VII	+	ERG25-610946-20bp	template	CACCCAATGTGTGAAAAATT	610925	610950	1181-0519	10uM	0.0569283	0.527	0.0555
broad_tiling	YMR079W	SEC14	XIII	+	SEC14-424455-20bp	nontemplate	CTATTTGTTAGACAAAATTG	424454	424479	4130-1276	2uM	-0.356872	0.231	0.00547
broad_tiling	YMR079W	SEC14	XIII	+	SEC14-424490-20bp	nontemplate	TGGAGATCAGACGACACGTA	424489	424514	4130-1276	2uM	0.192671	0.664	0.00731
broad_tiling	YMR079W	SEC14	XIII	+	SEC14-424510-20bp	nontemplate	ACACTAACCCAGATACTGTT	424509	424534	4130-1276	2uM	0.353366	0.426	0.00717
broad_tiling	YMR079W	SEC14	XIII	+	SEC14-424524-20bp	template	TCTGATCTCCAAACAGTATC	424498	424523	4130-1276	2uM	0.345802	0.533	0.00284
broad_tiling	YMR079W	SEC14	XIII	+	SEC14-424525-20bp	template	CTGATCTCCAAACAGTATCT	424499	424524	4130-1276	2uM	0.345802	-0.413	0.0146
broad_tiling	YMR079W	SEC14	XIII	+	SEC14-424546-20bp	nontemplate	AGCCTGCGAAGTTAGCAACC	424545	424570	4130-1276	2uM	-0.132629	-0.03	0.00492
broad_tiling	YMR079W	SEC14	XIII	+	SEC14-424547-20bp	nontemplate	AAGCCTGCGAAGTTAGCAAC	424546	424571	4130-1276	2uM	-0.162427	-0.15	0.0528
broad_tiling	YMR079W	SEC14	XIII	+	SEC14-424550-20bp	template	AGTGTATAGACTAATATTCC	424524	424549	4130-1276	2uM	0.164621	0.302	0.00461
broad_tiling	YMR079W	SEC14	XIII	+	SEC14-424566-20bp	template	TTCCCGGTTGCTAACTTCGC	424540	424565	4130-1276	2uM	-0.0803043	0.317	0.00537
broad_tiling	YMR079W	SEC14	XIII	+	SEC14-424584-20bp	nontemplate	TGTATCAAGTACTGGCGAAA	424583	424608	4130-1276	2uM	-0.79123	0.39	0.00666
broad_tiling	YMR079W	SEC14	XIII	+	SEC14-424592-20bp	nontemplate	CACGCGTTTGTATCAAGTAC	424591	424616	4130-1276	2uM	-1.02619	0.266	0.0112
broad_tiling	YMR079W	SEC14	XIII	+	SEC14-424623-20bp	nontemplate	TAATGCAATTGGTATTAATG	424622	424647	4130-1276	2uM	-1.13411	-0.417	0.0154
broad_tiling	YMR079W	SEC14	XIII	+	SEC14-424634-20bp	nontemplate	GCCCCTGGTAATAATGCAAT	424633	424658	4130-1276	2uM	-0.77011	0.062	0.0115
broad_tiling	YMR079W	SEC14	XIII	+	SEC14-424649-20bp	nontemplate	GGTGATATAGAACAAGCCCC	424648	424673	4130-1276	2uM	-0.132584	-0.522	0.00628
broad_tiling	YMR079W	SEC14	XIII	+	SEC14-424653-20bp	template	ATACCAATTGCATTATTACC	424627	424652	4130-1276	2uM	-0.998905	0.062	0.00349
broad_tiling	YMR079W	SEC14	XIII	+	SEC14-424654-20bp	template	TACCAATTGCATTATTACCA	424628	424653	4130-1276	2uM	-0.924187	-0.242	0.00713
broad_tiling	YMR079W	SEC14	XIII	+	SEC14-424655-20bp	template	ACCAATTGCATTATTACCAG	424629	424654	4130-1276	2uM	-0.924187	0.327	0.00551
broad_tiling	YMR079W	SEC14	XIII	+	SEC14-424685-20bp	template	TATATCACCAGTATCAAAAA	424659	424684	4130-1276	2uM	0.200518	0.757	0.00935
broad_tiling	YMR079W	SEC14	XIII	+	SEC14-424693-20bp	nontemplate	CACCATACATTGGTTCACTA	424692	424717	4130-1276	2uM	0.717067	0.938	0.014
broad_tiling	YMR079W	SEC14	XIII	+	SEC14-424694-20bp	nontemplate	GCACCATACATTGGTTCACT	424693	424718	4130-1276	2uM	0.717067	0.12	0.0074
broad_tiling	YMR079W	SEC14	XIII	+	SEC14-424703-20bp	nontemplate	GTTGATACCGCACCATACAT	424702	424727	4130-1276	2uM	0.642843	0.157	0.0107
broad_tiling	YMR079W	SEC14	XIII	+	SEC14-424718-20bp	template	TAGTGAACCAATGTATGGTG	424692	424717	4130-1276	2uM	0.717067	0.155	0.00314
broad_tiling	YMR079W	SEC14	XIII	+	SEC14-424725-20bp	nontemplate	GGATGTAAGGTCAGGGATCA	424724	424749	4130-1276	2uM	0.135019	0.25	0.0143
broad_tiling	YMR079W	SEC14	XIII	+	SEC14-424732-20bp	nontemplate	AAAAGGTGGATGTAAGGTCA	424731	424756	4130-1276	2uM	-0.0218433	-0.267	0.00472
broad_tiling	YMR079W	SEC14	XIII	+	SEC14-424733-20bp	nontemplate	CAAAAGGTGGATGTAAGGTC	424732	424757	4130-1276	2uM	-0.07176	-0.386	0.0144
broad_tiling	YMR079W	SEC14	XIII	+	SEC14-424738-20bp	nontemplate	TGACCCAAAAGGTGGATGTA	424737	424762	4130-1276	2uM	-0.201689	-1.772	0.00635
broad_tiling	YMR079W	SEC14	XIII	+	SEC14-424746-20bp	nontemplate	ACACTATTTGACCCAAAAGG	424745	424770	4130-1276	2uM	-0.529157	-4.47	0.224
broad_tiling	YMR079W	SEC14	XIII	+	SEC14-424749-20bp	nontemplate	TGTACACTATTTGACCCAAA	424748	424773	4130-1276	2uM	-0.733131	0.022	0.00294
broad_tiling	YMR079W	SEC14	XIII	+	SEC14-424756-20bp	template	CTGACCTTACATCCACCTTT	424730	424755	4130-1276	2uM	-0.0218433	-0.248	0.00702
broad_tiling	YMR079W	SEC14	XIII	+	SEC14-424757-20bp	template	TGACCTTACATCCACCTTTT	424731	424756	4130-1276	2uM	-0.0218433	-0.17	0.00749
broad_tiling	YMR079W	SEC14	XIII	+	SEC14-424778-20bp	template	GGTCAAATAGTGTACACATT	424752	424777	4130-1276	2uM	-0.977207	-1.282	0.0101
gene_tiling_18bp	YMR079W	SEC14	XIII	+	SEC14-424821-18bp	nontemplate	CTAGCCAGTCGCGTTGTA	424820	424843	4130-1276	2uM	-1.04637	-0.874	0.035
gene_tiling_20bp	YMR079W	SEC14	XIII	+	SEC14-424821-20bp	nontemplate	AACTAGCCAGTCGCGTTGTA	424820	424845	4130-1276	2uM	-1.05693	-1.057	0.0877
broad_tiling	YMR079W	SEC14	XIII	+	SEC14-424821-20bp	nontemplate	AACTAGCCAGTCGCGTTGTA	424820	424845	4130-1276	2uM	-1.05693	-1.422	0.0598
gene_tiling_18bp	YMR079W	SEC14	XIII	+	SEC14-424837-18bp	template	TGTTCCGTACAACGCGAC	424813	424836	4130-1276	2uM	-1.1693	-0.857	0.0135
broad_tiling	YMR079W	SEC14	XIII	+	SEC14-424837-20bp	template	GATGTTCCGTACAACGCGAC	424811	424836	4130-1276	2uM	-1.1693	-3.408	0.015
gene_tiling_18bp	YMR079W	SEC14	XIII	+	SEC14-424852-18bp	nontemplate	ACGTTGAAAAAAAAAATG	424851	424874	4130-1276	2uM	-2.17713	-0.368	0.0164
broad_tiling	YMR079W	SEC14	XIII	+	SEC14-424852-20bp	nontemplate	CAACGTTGAAAAAAAAAATG	424851	424876	4130-1276	2uM	-2.17713	0.392	0.0748
gene_tiling_20bp	YMR079W	SEC14	XIII	+	SEC14-424852-20bp	nontemplate	CAACGTTGAAAAAAAAAATG	424851	424876	4130-1276	2uM	-2.17713	-0.584	0.0109
gene_tiling_18bp	YMR079W	SEC14	XIII	+	SEC14-424890-18bp	template	CGTTGATCAACAATAAAA	424866	424889	4130-1276	2uM	-2.71726	-2.329	0.0838
gene_tiling_20bp	YMR079W	SEC14	XIII	+	SEC14-424890-20bp	template	AACGTTGATCAACAATAAAA	424864	424889	4130-1276	2uM	-2.68583	-6.529	0.497
gene_tiling_18bp	YMR079W	SEC14	XIII	+	SEC14-424899-18bp	nontemplate	CACTTAAGACACAAACAA	424898	424921	4130-1276	2uM	-1.91585	-8.359	8.89
gene_tiling_20bp	YMR079W	SEC14	XIII	+	SEC14-424899-20bp	nontemplate	GACACTTAAGACACAAACAA	424898	424923	4130-1276	2uM	-1.91585	-5.459	0.404
broad_tiling	YMR079W	SEC14	XIII	+	SEC14-424899-20bp	nontemplate	GACACTTAAGACACAAACAA	424898	424923	4130-1276	2uM	-1.91585	-7.542	9.35
gene_tiling_18bp	YMR079W	SEC14	XIII	+	SEC14-424921-18bp	nontemplate	CAAGCGATATACCAGGAA	424920	424943	4130-1276	2uM	-1.13264	-5.584	0.922
broad_tiling	YMR079W	SEC14	XIII	+	SEC14-424921-20bp	nontemplate	GTCAAGCGATATACCAGGAA	424920	424945	4130-1276	2uM	-1.01253	0.636	0.0902
gene_tiling_20bp	YMR079W	SEC14	XIII	+	SEC14-424921-20bp	nontemplate	GTCAAGCGATATACCAGGAA	424920	424945	4130-1276	2uM	-1.01253	-6.436	1.01
gene_tiling_18bp	YMR079W	SEC14	XIII	+	SEC14-424926-18bp	nontemplate	CTGGTCAAGCGATATACC	424925	424948	4130-1276	2uM	-0.915633	-5.276	0.289
gene_tiling_20bp	YMR079W	SEC14	XIII	+	SEC14-424926-20bp	nontemplate	CGCTGGTCAAGCGATATACC	424925	424950	4130-1276	2uM	-0.822984	-8.123	10.4
broad_tiling	YMR079W	SEC14	XIII	+	SEC14-424926-20bp	nontemplate	CGCTGGTCAAGCGATATACC	424925	424950	4130-1276	2uM	-0.822984	-9.662	10.6
gene_tiling_18bp	YMR079W	SEC14	XIII	+	SEC14-424930-18bp	template	GTCTTAAGTGTCCTTTCC	424906	424929	4130-1276	2uM	-1.62622	-0.936	0.0135
gene_tiling_20bp	YMR079W	SEC14	XIII	+	SEC14-424930-20bp	template	GTGTCTTAAGTGTCCTTTCC	424904	424929	4130-1276	2uM	-1.69382	-3.695	0.0466
broad_tiling	YMR079W	SEC14	XIII	+	SEC14-424930-20bp	template	GTGTCTTAAGTGTCCTTTCC	424904	424929	4130-1276	2uM	-1.69382	-4.302	0.0454
gene_tiling_18bp	YMR079W	SEC14	XIII	+	SEC14-424943-18bp	nontemplate	GTTTGATGCTACAGGCGC	424942	424965	4130-1276	2uM	-0.014145	0.478	0.00853
gene_tiling_20bp	YMR079W	SEC14	XIII	+	SEC14-424943-20bp	nontemplate	TGGTTTGATGCTACAGGCGC	424942	424967	4130-1276	2uM	-0.014145	0.933	0.0323
broad_tiling	YMR079W	SEC14	XIII	+	SEC14-424943-20bp	nontemplate	TGGTTTGATGCTACAGGCGC	424942	424967	4130-1276	2uM	-0.014145	0.325	0.00612
gene_tiling_18bp	YMR079W	SEC14	XIII	+	SEC14-424949-18bp	nontemplate	GGTTTGGTTTGATGCTAC	424948	424971	4130-1276	2uM	0.070885	0.147	0.0494
gene_tiling_20bp	YMR079W	SEC14	XIII	+	SEC14-424949-20bp	nontemplate	AAGGTTTGGTTTGATGCTAC	424948	424973	4130-1276	2uM	0.0938614	-2.139	0.0276
broad_tiling	YMR079W	SEC14	XIII	+	SEC14-424949-20bp	nontemplate	AAGGTTTGGTTTGATGCTAC	424948	424973	4130-1276	2uM	0.0938614	-2.372	0.00873
gene_tiling_18bp	YMR079W	SEC14	XIII	+	SEC14-424963-18bp	nontemplate	TTTAGGGCGATGAAGGTT	424962	424985	4130-1276	2uM	0.241668	-1.533	0.015
broad_tiling	YMR079W	SEC14	XIII	+	SEC14-424963-20bp	nontemplate	GTTTTAGGGCGATGAAGGTT	424962	424987	4130-1276	2uM	0.241668	-3.856	0.078
gene_tiling_20bp	YMR079W	SEC14	XIII	+	SEC14-424963-20bp	nontemplate	GTTTTAGGGCGATGAAGGTT	424962	424987	4130-1276	2uM	0.241668	-4.336	0.181
gene_tiling_18bp	YMR079W	SEC14	XIII	+	SEC14-424968-18bp	nontemplate	TGTGTTTTAGGGCGATGA	424967	424990	4130-1276	2uM	0.270498	0.331	0.0055
gene_tiling_20bp	YMR079W	SEC14	XIII	+	SEC14-424968-20bp	nontemplate	ATTGTGTTTTAGGGCGATGA	424967	424992	4130-1276	2uM	0.270498	-4.132	0.335
broad_tiling	YMR079W	SEC14	XIII	+	SEC14-424968-20bp	nontemplate	ATTGTGTTTTAGGGCGATGA	424967	424992	4130-1276	2uM	0.270498	-5.262	0.0594
gene_tiling_18bp	YMR079W	SEC14	XIII	+	SEC14-424977-18bp	nontemplate	TGTAACCATTGTGTTTTA	424976	424999	4130-1276	2uM	0.35775	0.492	0.004
broad_tiling	YMR079W	SEC14	XIII	+	SEC14-424977-20bp	nontemplate	ACTGTAACCATTGTGTTTTA	424976	425001	4130-1276	2uM	0.374859	-0.304	0.00529
gene_tiling_20bp	YMR079W	SEC14	XIII	+	SEC14-424977-20bp	nontemplate	ACTGTAACCATTGTGTTTTA	424976	425001	4130-1276	2uM	0.374859	-0.442	0.00548
broad_tiling	YMR079W	SEC14	XIII	+	SEC14-424978-20bp	nontemplate	TACTGTAACCATTGTGTTTT	424977	425002	4130-1276	2uM	0.374859	0.332	0.00331
gene_tiling_18bp	YMR079W	SEC14	XIII	+	SEC14-424992-18bp	template	CATCGCCCTAAAACACAA	424968	424991	4130-1276	2uM	0.270498	-1.261	0.129
broad_tiling	YMR079W	SEC14	XIII	+	SEC14-424992-20bp	template	TTCATCGCCCTAAAACACAA	424966	424991	4130-1276	2uM	0.270498	0.393	0.0173
gene_tiling_20bp	YMR079W	SEC14	XIII	+	SEC14-424992-20bp	template	TTCATCGCCCTAAAACACAA	424966	424991	4130-1276	2uM	0.270498	-1.188	0.136
broad_tiling	YMR079W	SEC14	XIII	+	SEC14-425127-20bp	template	AGTTTACTAACAAACACAAG	425101	425126	4130-1276	2uM	-0.585604	-0.362	0.00879
broad_tiling	YMR079W	SEC14	XIII	+	SEC14-425166-20bp	template	CTTTAAATAGCAACAAGAAA	425140	425165	4130-1276	2uM	0.355787	0.45	0.0134
broad_tiling	YMR079W	SEC14	XIII	+	SEC14-425179-20bp	nontemplate	TGGAGGACAGTTTTGAGGGT	425178	425203	4130-1276	2uM	0.242468	0.535	0.00485
broad_tiling	YMR079W	SEC14	XIII	+	SEC14-425183-20bp	nontemplate	CATCTGGAGGACAGTTTTGA	425182	425207	4130-1276	2uM	0.22069	0.309	0.00595
broad_tiling	YMR079W	SEC14	XIII	+	SEC14-425184-20bp	nontemplate	GCATCTGGAGGACAGTTTTG	425183	425208	4130-1276	2uM	0.22069	0.245	0.00237
broad_tiling	YMR079W	SEC14	XIII	+	SEC14-425196-20bp	nontemplate	GTACCAGGCAAGGCATCTGG	425195	425220	4130-1276	2uM	0.0191333	0.526	0.0048
broad_tiling	YMR079W	SEC14	XIII	+	SEC14-425199-20bp	nontemplate	GGAGTACCAGGCAAGGCATC	425198	425223	4130-1276	2uM	-0.0680633	-0.212	0.0239
broad_tiling	YMR079W	SEC14	XIII	+	SEC14-425206-20bp	nontemplate	ATTTCCTGGAGTACCAGGCA	425205	425230	4130-1276	2uM	-0.162197	-0.377	0.0122
broad_tiling	YMR079W	SEC14	XIII	+	SEC14-425211-20bp	nontemplate	TCTAAATTTCCTGGAGTACC	425210	425235	4130-1276	2uM	-0.25908	-0.19	0.00704
broad_tiling	YMR079W	SEC14	XIII	+	SEC14-425215-20bp	template	TGTCCTCCAGATGCCTTGCC	425189	425214	4130-1276	2uM	0.119993	0.315	0.00175
broad_tiling	YMR079W	SEC14	XIII	+	SEC14-425220-20bp	nontemplate	TGAGCGCTGTCTAAATTTCC	425219	425244	4130-1276	2uM	-0.320942	0.117	0.00305
broad_tiling	YMR079W	SEC14	XIII	+	SEC14-425224-20bp	template	GATGCCTTGCCTGGTACTCC	425198	425223	4130-1276	2uM	-0.0680633	0.301	0.00293
broad_tiling	YMR079W	SEC14	XIII	+	SEC14-425250-20bp	template	TTTAGACAGCGCTCAAGAGA	425224	425249	4130-1276	2uM	-0.337129	0.248	0.0148
broad_tiling	YMR079W	SEC14	XIII	+	SEC14-425256-20bp	template	CAGCGCTCAAGAGAAGGCAT	425230	425255	4130-1276	2uM	-0.343202	-6.779	1.92
broad_tiling	YMR079W	SEC14	XIII	+	SEC14-425277-20bp	template	GGCAGAACTAAGAAAACTTT	425251	425276	4130-1276	2uM	-0.0761483	0.766	0.00617
broad_tiling	YMR079W	SEC14	XIII	+	SEC14-425287-20bp	template	AGAAAACTTTTGGAAGACGC	425261	425286	4130-1276	2uM	0.101577	0.571	0.00435
broad_tiling	YMR079W	SEC14	XIII	+	SEC14-425335-20bp	nontemplate	CAATTGAACATCAAATTTTC	425334	425359	4130-1276	2uM	-0.0348733	0.345	0.00759
broad_tiling	YMR079W	SEC14	XIII	+	SEC14-425358-20bp	template	CAGAAAATTTGATGTTCAAT	425332	425357	4130-1276	2uM	-0.0143986	-0.133	0.0408
broad_tiling	YMR079W	SEC14	XIII	+	SEC14-425390-20bp	template	TGTTTGAAAACTGCGAAAAA	425364	425389	4130-1276	2uM	-0.367894	0.757	0.0181
broad_tiling	YMR079W	SEC14	XIII	+	SEC14-425393-20bp	template	TTGAAAACTGCGAAAAATGG	425367	425392	4130-1276	2uM	-0.399573	0.477	0.0288
broad_tiling	YMR079W	SEC14	XIII	+	SEC14-425397-20bp	template	AAACTGCGAAAAATGGAGGA	425371	425396	4130-1276	2uM	-0.465842	-5.721	0.424
broad_tiling	YMR079W	SEC14	XIII	+	SEC14-425404-20bp	template	GAAAAATGGAGGAAGGATTA	425378	425403	4130-1276	2uM	-0.585657	0.257	0.0113
broad_tiling	YMR079W	SEC14	XIII	+	SEC14-425407-20bp	nontemplate	AAAATCTTGCAAGATAGTGT	425406	425431	4130-1276	2uM	-0.544498	-2.126	0.0369
broad_tiling	YIL143C	SSL2	IX	-	SSL2-82585-20bp	template	TTTCTCTCCATTAGCAGAAC	82585	82610	Doxorubicin	12.5uM	0.153679	-0.375	0.011
broad_tiling	YIL143C	SSL2	IX	-	SSL2-82612-20bp	template	AAGTGACGGTAGGATCATTC	82612	82637	Doxorubicin	12.5uM	-0.396664	-4.162	0.1
broad_tiling	YIL143C	SSL2	IX	-	SSL2-82622-20bp	template	GGATCTCGCCAAGTGACGGT	82622	82647	Doxorubicin	12.5uM	-0.342713	-2.551	0.0179
broad_tiling	YIL143C	SSL2	IX	-	SSL2-82626-20bp	template	CTTTGGATCTCGCCAAGTGA	82626	82651	Doxorubicin	12.5uM	-0.308915	-1.573	0.0186
broad_tiling	YIL143C	SSL2	IX	-	SSL2-82636-20bp	nontemplate	AGAATGATCCTACCGTCACT	82611	82636	Doxorubicin	12.5uM	-0.4049	-4.067	0.0742
broad_tiling	YIL143C	SSL2	IX	-	SSL2-82643-20bp	template	ACCATGCTTCCAGGCCCCTT	82643	82668	Doxorubicin	12.5uM	-0.0481533	-0.792	0.0141
broad_tiling	YIL143C	SSL2	IX	-	SSL2-82649-20bp	nontemplate	CGTCACTTGGCGAGATCCAA	82624	82649	Doxorubicin	12.5uM	-0.320884	-2.201	0.0905
broad_tiling	YIL143C	SSL2	IX	-	SSL2-82650-20bp	nontemplate	GTCACTTGGCGAGATCCAAA	82625	82650	Doxorubicin	12.5uM	-0.320884	-6.582	1.05
broad_tiling	YIL143C	SSL2	IX	-	SSL2-82651-20bp	nontemplate	TCACTTGGCGAGATCCAAAG	82626	82651	Doxorubicin	12.5uM	-0.308915	-4.484	0.243
broad_tiling	YIL143C	SSL2	IX	-	SSL2-82652-20bp	template	TAAGACCAGACCATGCTTCC	82652	82677	Doxorubicin	12.5uM	0.122809	0.019	0.00293
broad_tiling	YIL143C	SSL2	IX	-	SSL2-82656-20bp	nontemplate	TGGCGAGATCCAAAGGGGCC	82631	82656	Doxorubicin	12.5uM	-0.262728	-2.627	0.0375
broad_tiling	YIL143C	SSL2	IX	-	SSL2-82664-20bp	nontemplate	TCCAAAGGGGCCTGGAAGCA	82639	82664	Doxorubicin	12.5uM	-0.140653	-0.267	0.0106
broad_tiling	YIL143C	SSL2	IX	-	SSL2-82669-20bp	nontemplate	AGGGGCCTGGAAGCATGGTC	82644	82669	Doxorubicin	12.5uM	-0.0110514	-4.03	0.153
broad_tiling	YIL143C	SSL2	IX	-	SSL2-82676-20bp	template	GCCATGACTTTAGTTATTTG	82676	82701	Doxorubicin	12.5uM	0.463719	0.696	0.0136
broad_tiling	YIL143C	SSL2	IX	-	SSL2-82697-20bp	nontemplate	ACCGCAAATAACTAAAGTCA	82672	82697	Doxorubicin	12.5uM	0.406544	-2.163	0.0499
broad_tiling	YIL143C	SSL2	IX	-	SSL2-82710-20bp	template	TTCGTTCCAGATTCCGTCTC	82710	82735	Doxorubicin	12.5uM	0.40866	0.034	0.00418
broad_tiling	YIL143C	SSL2	IX	-	SSL2-82719-20bp	nontemplate	GCTTCTGAACATTCCAGAGA	82694	82719	Doxorubicin	12.5uM	0.58368	-2.577	0.0674
broad_tiling	YIL143C	SSL2	IX	-	SSL2-82726-20bp	nontemplate	AACATTCCAGAGACGGAATC	82701	82726	Doxorubicin	12.5uM	0.54343	-3.762	0.0808
broad_tiling	YIL143C	SSL2	IX	-	SSL2-82741-20bp	nontemplate	GAATCTGGAACGAAATCTGC	82716	82741	Doxorubicin	12.5uM	0.323021	-0.598	0.0203
broad_tiling	YIL143C	SSL2	IX	-	SSL2-82759-20bp	template	TAAGGATAAAGCGCTTTTGC	82759	82784	Doxorubicin	12.5uM	-0.628245	0.208	0.0127
broad_tiling	YIL143C	SSL2	IX	-	SSL2-82777-20bp	template	TATGAATCAAATGGACGCTA	82777	82802	Doxorubicin	12.5uM	-0.836037	-0.679	0.0147
broad_tiling	YIL143C	SSL2	IX	-	SSL2-82786-20bp	template	GGATTCCTCTATGAATCAAA	82786	82811	Doxorubicin	12.5uM	-0.667688	-0.33	0.0786
broad_tiling	YIL143C	SSL2	IX	-	SSL2-82803-20bp	nontemplate	AGCGTCCATTTGATTCATAG	82778	82803	Doxorubicin	12.5uM	-0.847482	0.469	0.0095
broad_tiling	YIL143C	SSL2	IX	-	SSL2-82807-20bp	template	GAGTAGCAGGCATACAGCGG	82807	82832	Doxorubicin	12.5uM	0.08132	-0.412	0.00415
broad_tiling	YIL143C	SSL2	IX	-	SSL2-82810-20bp	template	CAAGAGTAGCAGGCATACAG	82810	82835	Doxorubicin	12.5uM	0.197553	-4.234	0.422
broad_tiling	YIL143C	SSL2	IX	-	SSL2-82820-20bp	template	GGAAAAAGACCAAGAGTAGC	82820	82845	Doxorubicin	12.5uM	0.35128	0.636	0.00409
broad_tiling	YIL143C	SSL2	IX	-	SSL2-82833-20bp	nontemplate	CGCTGTATGCCTGCTACTCT	82808	82833	Doxorubicin	12.5uM	0.130047	0.387	0.00352
broad_tiling	YIL143C	SSL2	IX	-	SSL2-82841-20bp	template	TAACAGGGTTGAAGAAGCCT	82841	82866	Doxorubicin	12.5uM	0.466806	0.559	0.0167
broad_tiling	YIL143C	SSL2	IX	-	SSL2-82856-20bp	template	ATACCGGCGCCATGGTAACA	82856	82881	Doxorubicin	12.5uM	0.472394	0.264	0.00462
broad_tiling	YIL143C	SSL2	IX	-	SSL2-82857-20bp	template	GATACCGGCGCCATGGTAAC	82857	82882	Doxorubicin	12.5uM	0.472394	0.191	0.00652
broad_tiling	YIL143C	SSL2	IX	-	SSL2-82864-20bp	template	AGAAAGGGATACCGGCGCCA	82864	82889	Doxorubicin	12.5uM	0.408117	0.668	0.00976
broad_tiling	YIL143C	SSL2	IX	-	SSL2-82869-20bp	nontemplate	CTTCTTCAACCCTGTTACCA	82844	82869	Doxorubicin	12.5uM	0.464581	-2.1	0.0356
broad_tiling	YIL143C	SSL2	IX	-	SSL2-82872-20bp	template	GGACGTGGAGAAAGGGATAC	82872	82897	Doxorubicin	12.5uM	0.3263	-1.81	0.0283
broad_tiling	YIL143C	SSL2	IX	-	SSL2-82875-20bp	nontemplate	CAACCCTGTTACCATGGCGC	82850	82875	Doxorubicin	12.5uM	0.474932	0.773	0.00726
broad_tiling	YIL143C	SSL2	IX	-	SSL2-82879-20bp	template	GTCAGAAGGACGTGGAGAAA	82879	82904	Doxorubicin	12.5uM	0.207872	-1.327	0.043
broad_tiling	YIL143C	SSL2	IX	-	SSL2-82880-20bp	template	CGTCAGAAGGACGTGGAGAA	82880	82905	Doxorubicin	12.5uM	0.161496	-1.4	0.0172
broad_tiling	YIL143C	SSL2	IX	-	SSL2-82887-20bp	template	AGGGAAACGTCAGAAGGACG	82887	82912	Doxorubicin	12.5uM	0.01324	-3.511	0.0346
broad_tiling	YIL143C	SSL2	IX	-	SSL2-82893-20bp	template	GATAACAGGGAAACGTCAGA	82893	82918	Doxorubicin	12.5uM	-0.130013	-0.251	0.0225
broad_tiling	YIL143C	SSL2	IX	-	SSL2-82906-20bp	template	TGAGAACTATGATGATAACA	82906	82931	Doxorubicin	12.5uM	-0.365375	-8.01	2.05
broad_tiling	YIL143C	SSL2	IX	-	SSL2-82951-20bp	nontemplate	TCGATCTCTGCATCAGTAGC	82926	82951	Doxorubicin	12.5uM	-0.380663	-5.058	0.214
broad_tiling	YIL143C	SSL2	IX	-	SSL2-82977-20bp	nontemplate	ATCCTCATCTGATGAGAAAA	82952	82977	Doxorubicin	12.5uM	-0.04692	-0.696	0.0448
broad_tiling	YIL143C	SSL2	IX	-	SSL2-82983-20bp	template	GGGAAAATCTTTCCAGATAT	82983	83008	Doxorubicin	12.5uM	0.46932	-0.264	0.0658
broad_tiling	YIL143C	SSL2	IX	-	SSL2-82984-20bp	template	GGGGAAAATCTTTCCAGATA	82984	83009	Doxorubicin	12.5uM	0.505783	0.481	0.0132
broad_tiling	YIL143C	SSL2	IX	-	SSL2-82993-20bp	nontemplate	AAAAAGGACTCACCCATATC	82968	82993	Doxorubicin	12.5uM	0.20308	-3.358	0.0656
broad_tiling	YIL143C	SSL2	IX	-	SSL2-83003-20bp	template	GCTACCAACCTAAGAGCAAG	83003	83028	Doxorubicin	12.5uM	0.5823	-1.044	0.0528
broad_tiling	YIL143C	SSL2	IX	-	SSL2-83004-20bp	template	GGCTACCAACCTAAGAGCAA	83004	83029	Doxorubicin	12.5uM	0.5717	-0.912	0.00828
gene_tiling_18bp	YIL143C	SSL2	IX	-	SSL2-83005-18bp	template	GCTACCAACCTAAGAGCA	83005	83028	Doxorubicin	12.5uM	0.5823	-1.537	0.0254
gene_tiling_20bp	YIL143C	SSL2	IX	-	SSL2-83005-20bp	template	AGGCTACCAACCTAAGAGCA	83005	83030	Doxorubicin	12.5uM	0.5717	0.288	0.0798
broad_tiling	YIL143C	SSL2	IX	-	SSL2-83005-20bp	template	AGGCTACCAACCTAAGAGCA	83005	83030	Doxorubicin	12.5uM	0.5717	-0.299	0.009
gene_tiling_18bp	YIL143C	SSL2	IX	-	SSL2-83017-18bp	nontemplate	GATTTTCCCCTTGCTCTT	82994	83017	Doxorubicin	12.5uM	0.596913	-0.498	0.0545
broad_tiling	YIL143C	SSL2	IX	-	SSL2-83017-20bp	nontemplate	AAGATTTTCCCCTTGCTCTT	82992	83017	Doxorubicin	12.5uM	0.575089	0.658	0.049
gene_tiling_20bp	YIL143C	SSL2	IX	-	SSL2-83017-20bp	nontemplate	AAGATTTTCCCCTTGCTCTT	82992	83017	Doxorubicin	12.5uM	0.575089	-0.945	0.0371
gene_tiling_18bp	YIL143C	SSL2	IX	-	SSL2-83021-18bp	nontemplate	TTCCCCTTGCTCTTAGGT	82998	83021	Doxorubicin	12.5uM	0.594138	-0.467	0.0231
broad_tiling	YIL143C	SSL2	IX	-	SSL2-83021-20bp	nontemplate	TTTTCCCCTTGCTCTTAGGT	82996	83021	Doxorubicin	12.5uM	0.586539	0.397	0.00357
gene_tiling_20bp	YIL143C	SSL2	IX	-	SSL2-83021-20bp	nontemplate	TTTTCCCCTTGCTCTTAGGT	82996	83021	Doxorubicin	12.5uM	0.586539	-0.311	0.0151
gene_tiling_18bp	YIL143C	SSL2	IX	-	SSL2-83025-18bp	template	AATCATGACGGACGTTGA	83025	83048	Doxorubicin	12.5uM	0.39474	-0.524	0.0168
gene_tiling_20bp	YIL143C	SSL2	IX	-	SSL2-83025-20bp	template	TAAATCATGACGGACGTTGA	83025	83050	Doxorubicin	12.5uM	0.370927	-0.431	0.0323
broad_tiling	YIL143C	SSL2	IX	-	SSL2-83025-20bp	template	TAAATCATGACGGACGTTGA	83025	83050	Doxorubicin	12.5uM	0.370927	-0.588	0.021
gene_tiling_18bp	YIL143C	SSL2	IX	-	SSL2-83035-18bp	template	GTGGAAGATAAATCATGA	83035	83058	Doxorubicin	12.5uM	0.259832	-0.192	0.018
broad_tiling	YIL143C	SSL2	IX	-	SSL2-83035-20bp	template	CAGTGGAAGATAAATCATGA	83035	83060	Doxorubicin	12.5uM	0.259832	-0.428	0.0164
gene_tiling_20bp	YIL143C	SSL2	IX	-	SSL2-83035-20bp	template	CAGTGGAAGATAAATCATGA	83035	83060	Doxorubicin	12.5uM	0.259832	-1.101	0.0126
gene_tiling_18bp	YIL143C	SSL2	IX	-	SSL2-83052-18bp	template	TACTGACGTTGGAATCAG	83052	83075	Doxorubicin	12.5uM	0.103088	-8.918	11.1
broad_tiling	YIL143C	SSL2	IX	-	SSL2-83052-20bp	template	TCTACTGACGTTGGAATCAG	83052	83077	Doxorubicin	12.5uM	0.0531343	-3.983	0.314
gene_tiling_20bp	YIL143C	SSL2	IX	-	SSL2-83052-20bp	template	TCTACTGACGTTGGAATCAG	83052	83077	Doxorubicin	12.5uM	0.0531343	-5.454	0.417
gene_tiling_18bp	YIL143C	SSL2	IX	-	SSL2-83061-18bp	template	AGTAGCATCTACTGACGT	83061	83084	Doxorubicin	12.5uM	-0.06706	-1.103	0.0113
broad_tiling	YIL143C	SSL2	IX	-	SSL2-83061-20bp	template	AAAGTAGCATCTACTGACGT	83061	83086	Doxorubicin	12.5uM	-0.103646	-4.299	0.189
gene_tiling_20bp	YIL143C	SSL2	IX	-	SSL2-83061-20bp	template	AAAGTAGCATCTACTGACGT	83061	83086	Doxorubicin	12.5uM	-0.103646	-5.673	0.687
gene_tiling_20bp	YIL143C	SSL2	IX	-	SSL2-83119-20bp	template	AAGGAAAAAGGTCCTTAGTA	83119	83144	Doxorubicin	12.5uM	-2.74961	-3.995	2.08
broad_tiling	YIL143C	SSL2	IX	-	SSL2-83119-20bp	template	AAGGAAAAAGGTCCTTAGTA	83119	83144	Doxorubicin	12.5uM	-2.74961	-6.135	9.5
gene_tiling_18bp	YIL143C	SSL2	IX	-	SSL2-83129-18bp	nontemplate	TATTATCTATCCTTACTA	83106	83129	Doxorubicin	12.5uM	-2.52792	-5.785	0.247
broad_tiling	YIL143C	SSL2	IX	-	SSL2-83129-20bp	nontemplate	ACTATTATCTATCCTTACTA	83104	83129	Doxorubicin	12.5uM	-2.47677	-3.559	0.28
gene_tiling_20bp	YIL143C	SSL2	IX	-	SSL2-83129-20bp	nontemplate	ACTATTATCTATCCTTACTA	83104	83129	Doxorubicin	12.5uM	-2.47677	-6.933	9.35
gene_tiling_18bp	YIL143C	SSL2	IX	-	SSL2-83131-18bp	template	TAAGAAGTATAAGGAAAA	83131	83154	Doxorubicin	12.5uM	-2.55012	-8.332	10.6
broad_tiling	YIL143C	SSL2	IX	-	SSL2-83131-20bp	template	TCTAAGAAGTATAAGGAAAA	83131	83156	Doxorubicin	12.5uM	-2.55012	-2.81	0.102
gene_tiling_20bp	YIL143C	SSL2	IX	-	SSL2-83131-20bp	template	TCTAAGAAGTATAAGGAAAA	83131	83156	Doxorubicin	12.5uM	-2.55012	-6.232	0.645
gene_tiling_18bp	YIL143C	SSL2	IX	-	SSL2-83161-18bp	template	TTCAGATCGTTAGAAACG	83161	83184	Doxorubicin	12.5uM	-1.56826	-7.592	1.99
gene_tiling_20bp	YIL143C	SSL2	IX	-	SSL2-83161-20bp	template	ATTTCAGATCGTTAGAAACG	83161	83186	Doxorubicin	12.5uM	-1.4752	-3.086	0.0894
broad_tiling	YIL143C	SSL2	IX	-	SSL2-83161-20bp	template	ATTTCAGATCGTTAGAAACG	83161	83186	Doxorubicin	12.5uM	-1.4752	-3.959	1.95
broad_tiling	YIL143C	SSL2	IX	-	SSL2-83240-20bp	nontemplate	AGAGCAGAGCAATAAAAAAG	83215	83240	Doxorubicin	12.5uM	-2.06612	-5.371	10.7
broad_tiling	YIL143C	SSL2	IX	-	SSL2-83248-20bp	nontemplate	GCAATAAAAAAGAGGATGAA	83223	83248	Doxorubicin	12.5uM	-2.09861	-5.025	0.651
broad_tiling	YIL143C	SSL2	IX	-	SSL2-83251-20bp	nontemplate	ATAAAAAAGAGGATGAAAGG	83226	83251	Doxorubicin	12.5uM	-2.04447	-4.973	0.965
broad_tiling	YIL143C	SSL2	IX	-	SSL2-83252-20bp	template	GACTCTTCTTGCCTATTTAA	83252	83277	Doxorubicin	12.5uM	-0.861023	-5.71	2.07
broad_tiling	YIL143C	SSL2	IX	-	SSL2-83263-20bp	nontemplate	ATGAAAGGTGGCCATTAAAT	83238	83263	Doxorubicin	12.5uM	-1.63928	-7.929	10.1
broad_tiling	YIL143C	SSL2	IX	-	SSL2-83301-20bp	nontemplate	GTACAAAGCTCAAAAGATTC	83276	83301	Doxorubicin	12.5uM	-0.0615686	-0.099	0.018
broad_tiling	YIL143C	SSL2	IX	-	SSL2-83321-20bp	nontemplate	AGGATGAGTGTACAGATATT	83296	83321	Doxorubicin	12.5uM	0.18587	-7.952	9.27
broad_tiling	YIL143C	SSL2	IX	-	SSL2-83325-20bp	template	CCGCTCTTTCTTCTGTAACC	83325	83350	Doxorubicin	12.5uM	0.341944	0.439	0.00665
broad_tiling	YIL143C	SSL2	IX	-	SSL2-83329-20bp	nontemplate	TGTACAGATATTTGGAGACC	83304	83329	Doxorubicin	12.5uM	0.251767	-0.276	0.0271
broad_tiling	YIL143C	SSL2	IX	-	SSL2-83347-20bp	nontemplate	CCAGGTTACAGAAGAAAGAG	83322	83347	Doxorubicin	12.5uM	0.34943	0.317	0.0318
broad_tiling	YIL143C	SSL2	IX	-	SSL2-83354-20bp	template	ACCGACAAACGCCGACAAAC	83354	83379	Doxorubicin	12.5uM	-0.0120517	-1.685	0.00938
broad_tiling	YIL143C	SSL2	IX	-	SSL2-83355-20bp	template	CACCGACAAACGCCGACAAA	83355	83380	Doxorubicin	12.5uM	-0.0120517	-0.077	0.0546
broad_tiling	YIL143C	SSL2	IX	-	SSL2-83365-20bp	nontemplate	AGCGGAAAACGCCCGTTTGT	83340	83365	Doxorubicin	12.5uM	0.209974	0.584	0.0121
broad_tiling	YIL143C	SSL2	IX	-	SSL2-83375-20bp	nontemplate	GCCCGTTTGTCGGCGTTTGT	83350	83375	Doxorubicin	12.5uM	0.0543067	0.528	0.00199
broad_tiling	YIL143C	SSL2	IX	-	SSL2-83378-20bp	template	CACCAAATCACCCACGGCAA	83378	83403	Doxorubicin	12.5uM	-0.491745	-1.628	0.0838
broad_tiling	YIL143C	SSL2	IX	-	SSL2-83384-20bp	template	GCTTTTCACCAAATCACCCA	83384	83409	Doxorubicin	12.5uM	-0.587526	-3.751	0.102
broad_tiling	YIL143C	SSL2	IX	-	SSL2-83389-20bp	nontemplate	GTTTGTCGGTGCCATTGCCG	83364	83389	Doxorubicin	12.5uM	-0.212879	0.501	0.00376
broad_tiling	YIL143C	SSL2	IX	-	SSL2-83390-20bp	nontemplate	TTTGTCGGTGCCATTGCCGT	83365	83390	Doxorubicin	12.5uM	-0.212879	0.603	0.0094
broad_tiling	YIL143C	SSL2	IX	-	SSL2-83398-20bp	nontemplate	TGCCATTGCCGTGGGTGATT	83373	83398	Doxorubicin	12.5uM	-0.373053	0.071	0.00297
broad_tiling	YIL143C	SSL2	IX	-	SSL2-83414-20bp	nontemplate	GATTTGGTGAAAAGCACATT	83389	83414	Doxorubicin	12.5uM	-0.65062	-0.584	0.00695
broad_tiling	YIL143C	SSL2	IX	-	SSL2-83415-20bp	template	ATAATTTATCCATCCCTTTT	83415	83440	Doxorubicin	12.5uM	-0.709805	-0.549	0.023
broad_tiling	YIL143C	SSL2	IX	-	SSL2-83416-20bp	template	AATAATTTATCCATCCCTTT	83416	83441	Doxorubicin	12.5uM	-0.650601	0.509	0.00392
broad_tiling	YIL143C	SSL2	IX	-	SSL2-83423-20bp	nontemplate	AAAAGCACATTAGGCCCAAA	83398	83423	Doxorubicin	12.5uM	-0.746542	0.41	0.0256
broad_tiling	YIL143C	SSL2	IX	-	SSL2-83424-20bp	nontemplate	AAAGCACATTAGGCCCAAAA	83399	83424	Doxorubicin	12.5uM	-0.746542	-3.301	0.0795
broad_tiling	YIL143C	SSL2	IX	-	SSL2-83450-20bp	template	TGTTACCATGCAAGTGTTAC	83450	83475	Doxorubicin	12.5uM	0.123533	0.382	0.00331
broad_tiling	YIL143C	SSL2	IX	-	SSL2-83467-20bp	nontemplate	TGCGTCCAGTAACACTTGCA	83442	83467	Doxorubicin	12.5uM	-0.017125	1.024	0.0103
broad_tiling	YIL143C	SSL2	IX	-	SSL2-83480-20bp	nontemplate	ACTTGCATGGTAACAAACGA	83455	83480	Doxorubicin	12.5uM	0.176742	0.279	0.0159
broad_tiling	YIL143C	SSL2	IX	-	SSL2-83503-20bp	template	TTGGCTGCGGGATTATCCAG	83503	83528	Doxorubicin	12.5uM	0.318072	0.512	0.00408
broad_tiling	YIL143C	SSL2	IX	-	SSL2-83509-20bp	nontemplate	GATTCTGAAGTCAATTCCGC	83484	83509	Doxorubicin	12.5uM	0.241829	0.292	0.00678
broad_tiling	YIL143C	SSL2	IX	-	SSL2-83515-20bp	template	TTCACCAACACTTTGGCTGC	83515	83540	Doxorubicin	12.5uM	0.299037	0.53	0.00238
broad_tiling	YIL143C	SSL2	IX	-	SSL2-83516-20bp	template	GTTCACCAACACTTTGGCTG	83516	83541	Doxorubicin	12.5uM	0.264691	0.535	0.0065
broad_tiling	YIL143C	SSL2	IX	-	SSL2-83522-20bp	template	ACTGATGTTCACCAACACTT	83522	83547	Doxorubicin	12.5uM	0.199643	0.445	0.0134
broad_tiling	YIL143C	SSL2	IX	-	SSL2-83533-20bp	nontemplate	TAATCCCGCAGCCAAAGTGT	83508	83533	Doxorubicin	12.5uM	0.31643	0.554	0.0149
broad_tiling	YIL143C	SSL2	IX	-	SSL2-83548-20bp	nontemplate	AGTGTTGGTGAACATCAGTA	83523	83548	Doxorubicin	12.5uM	0.199643	-0.611	0.0238
broad_tiling	YIL143C	SSL2	IX	-	SSL2-83554-20bp	nontemplate	GGTGAACATCAGTAAGGTGC	83529	83554	Doxorubicin	12.5uM	0.0941357	0.658	0.00502
broad_tiling	YIL143C	SSL2	IX	-	SSL2-83567-20bp	nontemplate	AAGGTGCAGGATGACGAAGT	83542	83567	Doxorubicin	12.5uM	-0.100658	-2.152	0.284
broad_tiling	YIL143C	SSL2	IX	-	SSL2-83573-20bp	nontemplate	CAGGATGACGAAGTTGGAGA	83548	83573	Doxorubicin	12.5uM	-0.168639	-0.026	0.0287
